# Supplementary material
Source: publisher site journal article supplement (https://www.dovepress.com/article/555596)
Supplement: Supplementary file 1 [file 555596%20Revised%20Supplemental%20Material.docx]

**Supplemental Material 1**

**Figure S1. Add-on vignettes including a physical function component**


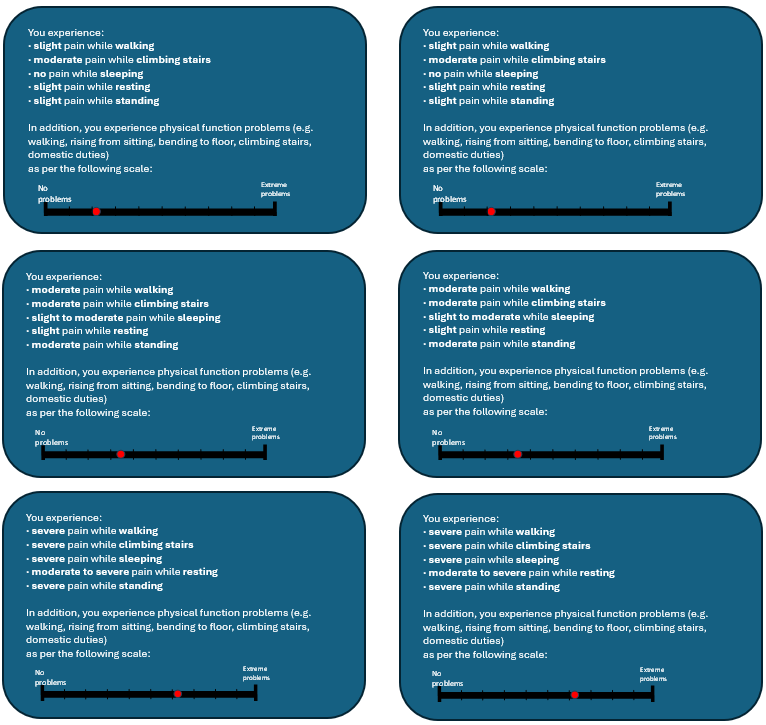


SL1

SV1

MD1

SL2

MD2

SV2


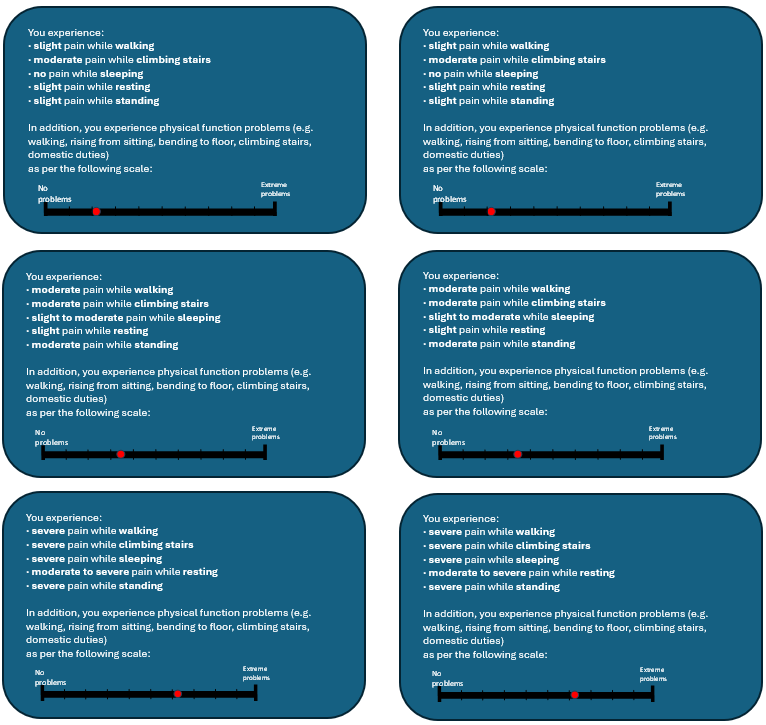


MSL1

MSV1

MMD1

MSL2

MMD2

MSV2


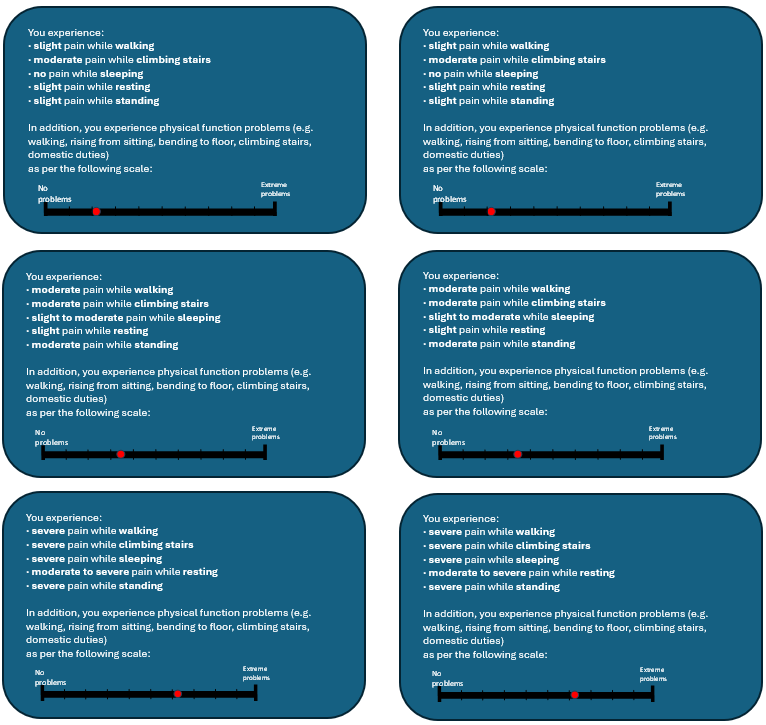


SL1 slight 1, SL2 slight 2, MD1 moderate 1, MD2 moderate 2, SV1 severe 1, SV2 severe 2

**Table S1. EQ-5D-5L dimension responses**

| **EQ-5D level/dimension** | **Mobility  % (N)** | **Self-care  % (N)** | **Usual activities  % (N)** | **Pain/ discomfort  % (N)** | **Anxiety/ depression  % (N)** |
| --- | --- | --- | --- | --- | --- |
| **No problems** | 4% (8) | 47.5% (94) | 9.6% (19) | 0.5% (1) | 37.9% (75) |
| **Slight problems** | 31.8% (63) | 25.3% (50) | 32.8% (65) | 30.8% (61) | 27.3% (54) |
| **Moderate problems** | 39.9% (79) | 22.7% (45) | 42.9% (85) | 41.9% (83) | 25.3% (50) |
| **Severe problems** | 24.2% (48) | 4.5% (9) | 12.1% (24) | 20.7% (41) | 6.1% (12) |
| **Unable/Extreme problems** | 0% (0) | 0% (0) | 2.5% (5) | 6.1% (12) | 3.5% (7) |
|  | **Mean** | **SD** | **25th percentile** | **Median** | **75th percentile** |
| **EQ VAS** | 56.04 | 19.77 | 40 | 60 | 70 |
| **UK EQ-5D-5L index values** | 0.472 | 0.266 | 0.278 | 0.549 | 0.679 |

SD standard deviation, VAS visual analogue scale, UK United Kingdom

**Table S2. Mean utility values for pain-based and pain+physical-based vignettes and the differences between the two sets of utilities**

| **Health states** | **N  (pain only)** | **Mean  (pain only)** | **N  (pain+physical)** | **Mean**  **(pain+physical)** | **Difference**  **(pain+physical) - (pain only)** |
| --- | --- | --- | --- | --- | --- |
| **SL1** | 198 | 0.983 | 102 | 0.965 | -0.018 |
| **SL2** | 198 | 0.896 | 96 | 0.869 | -0.027 |
| **MD1** | 198 | 0.797 | 102 | 0.798 | 0.001 |
| **MD2** | 198 | 0.710 | 96 | 0.627 | -0.083 |
| **SV1** | 198 | 0.458 | 102 | 0.457 | -0.001 |
| **SV2** | 198 | 0.305 | 96 | 0.283 | -0.022 |
| **Differences between health states** |  | | | | |
| **SL2-SL1** |  | -0.087 |  | -0.096 |  |
| **MD1-SL2** |  | -0.099 |  | -0.071 |  |
| **MD2-MD1** |  | -0.087 |  | -0.171 |  |
| **SV1-MD2** |  | -0.252 |  | -0.170 |  |
| **SV2-SV1** |  | -0.153 |  | -0.174 |  |

SL1 slight 1, SL2 slight 2, MD1 moderate 1, MD2 moderate 2, SV1 severe 1, SV2 severe 2

**Note: pain+physical-based vignettes were grouped into 2 groups (SL1/MD1/SV1 and SL2/MD2/SV2) and randomly assigned to half/half of the participants**

**Table S3. Differences mean vs mean censored utility values for pain-based and pain+physical-based vignettes**

|  | Pain-based health states | | | Pain+physical-based health states | | |
| --- | --- | --- | --- | --- | --- | --- |
| **Health States** | **Mean** | **Censored mean** | **Difference** | **Mean** | **Censored mean** | **Difference** |
| **(mean - censored mean)** | **(mean - censored mean)** |
| **SL1** | 0.983 | 0.983 | 0 | 0.965 | 0.965 | 0 |
| **SL2** | 0.896 | 0.896 | 0 | 0.869 | 0.869 | 0 |
| **MD1** | 0.797 | 0.797 | 0 | 0.798 | 0.797 | -0.001 |
| **MD2** | 0.71 | 0.708 | -0.002 | 0.627 | 0.624 | -0.003 |
| **SV1** | 0.458 | 0.44 | -0.018 | 0.457 | 0.44 | -0.017 |
| **SV2** | 0.305 | 0.247 | -0.058 | 0.283 | 0.221 | -0.062 |
| **Differences between health states SL1 as reference** | | | | | |  |
| **SL2-SL1** | -0.087 | -0.087 |  | -0.096 | -0.096 |  |
| **MD1-SL2** | -0.099 | -0.099 |  | -0.071 | -0.072 |  |
| **MD2-MD1** | -0.087 | -0.089 |  | -0.171 | -0.173 |  |
| **SV1-MD2** | -0.252 | -0.268 |  | -0.17 | -0.184 |  |
| **SV2-SV1** | -0.153 | -0.193 |  | -0.174 | -0.219 |  |

SL1 slight 1, SL2 slight 2, MD1 moderate 1, MD2 moderate 2, SV1 severe 1, SV2 severe 2
